# Supplementary material
Source: publisher figshare collection journal article supplement (https://aacr.figshare.com/articles/dataset/_/22386710)

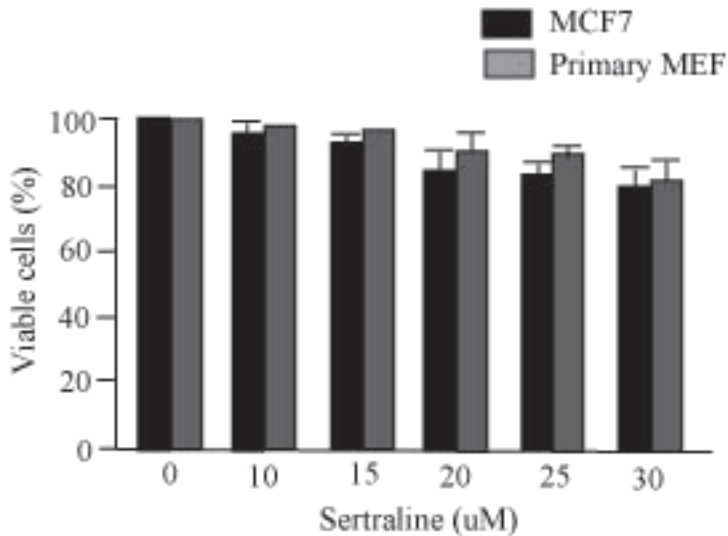

**Suppl. Figure 1**

Supplement: Supplementary file 1 [file 39832178]
